# Supplementary material for: Structure, optical and luminescence properties of anhydrous samarium iodate Sm3(IO3)9(HIO3)4
Source: Royal Society of Chemistry journal article supplement (doi:10.1039/d2dt00799a), 2022-01-01
Supplement: d2dt00799a1.pdf [file d2dt00799a1.pdf]

## Supporting Information

### Structure, optical and luminescent properties of anhydrous samarium iodate

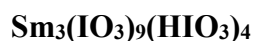

Ruixin Guo,<sup>a,b</sup> Changcheng Tang,<sup>a,c</sup> Mingjun Xia,<sup>a</sup> Lijuan Liu,<sup>\*,a</sup> and Xiaoyang Wang<sup>\*,a</sup>

a Beijing Centre for Crystal Research and Development, Key Laboratory of Functional Crystals and Laser Technology, Technical Institute of Physics and Chemistry, Chinese Academy of Sciences, Beijing 100190, China

b University of Chinese Academy of Sciences, Beijing 100190, P.R. China

c College of Mechanical and Electrical Engineering, WuYi University, Nanping, Fujian 354300, China.

## Table of Contents

### Result and discussion

**Figure S1** UV–vis–NIR diffuse-reflectance spectrum of  $\text{Sm}_3(\text{IO}_3)_9(\text{HIO}_3)_4$ .

**Figure S2** The IR spectra of  $\text{Sm}_3(\text{IO}_3)_9(\text{HIO}_3)_4$ .

**Figure S3** Fluorescence lifetime decay curve of the  ${}^6\text{H}_{5/2}$ - ${}^6\text{H}_{7/2}$  luminescence of  $\text{Sm}_3(\text{IO}_3)_9(\text{HIO}_3)_4$  crystal under 466 nm excitation.

**Table S1** Atomic coordinates and equivalent isotropic displacement parameters ( $\text{\AA}^2$ ) for  $\text{Sm}_3(\text{IO}_3)_9(\text{HIO}_3)_4$

**Table S2** Atomic displacement parameters ( $\text{\AA}^2$ ) for  $\text{Sm}_3(\text{IO}_3)_9(\text{HIO}_3)_4$

**Table S3** Selected bond lengths ( $\text{\AA}$ ) and bond angles (deg.) for  $\text{Sm}_3(\text{IO}_3)_9(\text{HIO}_3)_4$

**Table S4** Selected bond angles (deg.) for  $\text{Sm}_3(\text{IO}_3)_9(\text{HIO}_3)_4$

**Structure Determination.** A transparent yellow crystal was selected, and was glued to the glass wire with epoxy resin. Afterwards, placed it on the Bruker APEX II single crystal X-ray diffraction instrument with  $\lambda=1.5418$  Å (Mo  $K\alpha$ ) for data collection. The preliminary structure was analyzed by using ShelXS-97 software, and the  $F_2$  was refined by using ShelXL-97 program. All atoms except hydrogen atoms were refined with anisotropic displacement parameters. The relevant crystallographic data are listed in **Table 1** and **Table S1-S4**.

**Powder X-ray Diffraction (PXRD).** A large number of crystals were ground into power. Then the powder was analyzed with a Bruker D8 X-ray diffractometer (Cu  $K\alpha$  radiation;  $\lambda = 0.71073$  Å), step width  $0.02^\circ$ , scanning rate  $0.1^\circ$ . The experimental XRD pattern was well-suited to the calculated one (**Figure 1**).

**Thermal Analysis.** Thermogravimetric analyses (TGA) and differential thermal analysis (DTA) were measured by NETZCH STA 2500. The samples were heated to  $1200^\circ\text{C}$  with the test conditions:  $\text{N}_2$  atmosphere, heating rate  $10^\circ\text{C}/\text{min}$ , cooling rate  $10^\circ\text{C}/\text{min}$ .

**UV-Vis Diffuse Reflectance Spectroscopy.** Perkin-elmer Lambda 900UV-Vis-NIR spectrometer was used to measure the optical transmission curve of  $\text{Sm}_3(\text{IO}_3)_9(\text{HIO}_3)_4$ , and the test range was 200~2000nm.

**Infrared Spectroscopy.** The crystals were ground into powder and mixed with KBr, then these substances were pressed into sheets. The Excalibur 3100 Fourier transform infrared spectrometer (FTIR) was used to record infrared spectra in the range of  $400\text{--}4000\text{cm}^{-1}$ .

**SHG Measurements.** The powder frequency-doubling effects were performed by the Kurtz–Perry method, and the pumping light was a 1064 nm Q-switched Nd: YAG solid-state laser. Crystals of  $\text{Sm}_3(\text{IO}_3)_9(\text{HIO}_3)_4$  were ground and the size range were 20–41  $\mu\text{m}$ . Sieved KDP samples with the corresponding size was used as the reference.

**Luminescence Spectroscopy.** The excitation spectrum, emission spectrum and fluorescence lifetime decay curve of  $\text{Sm}_3(\text{IO}_3)_9(\text{HIO}_3)_4$  crystal were measured by an Edinburgh Instruments FLS920 spectrophotometer. The 410 nm radiations was emitted by xenon lamp laser.

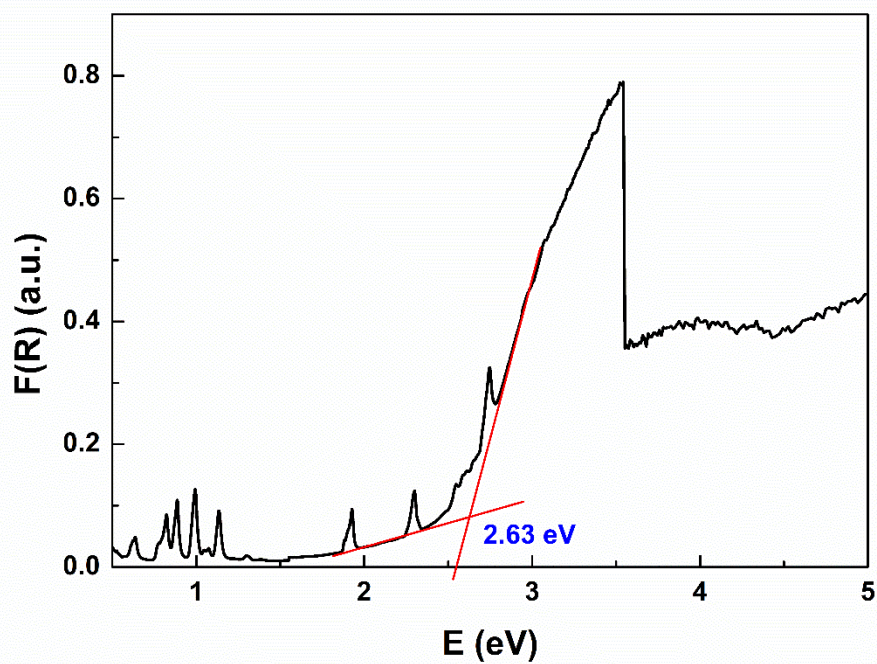

**Figure S1** UV-vis-NIR diffuse-reflectance spectrum of  $\text{Sm}_3(\text{IO}_3)_9(\text{HIO}_3)_4$ .

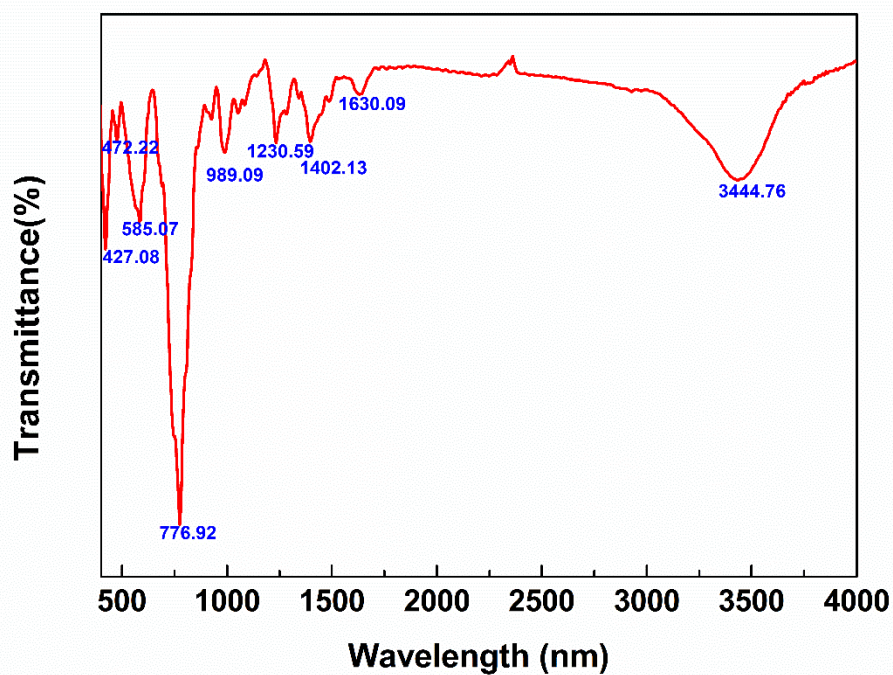

**Figure S2** The IR spectra of  $\text{Sm}_3(\text{IO}_3)_9(\text{HIO}_3)_4$ .

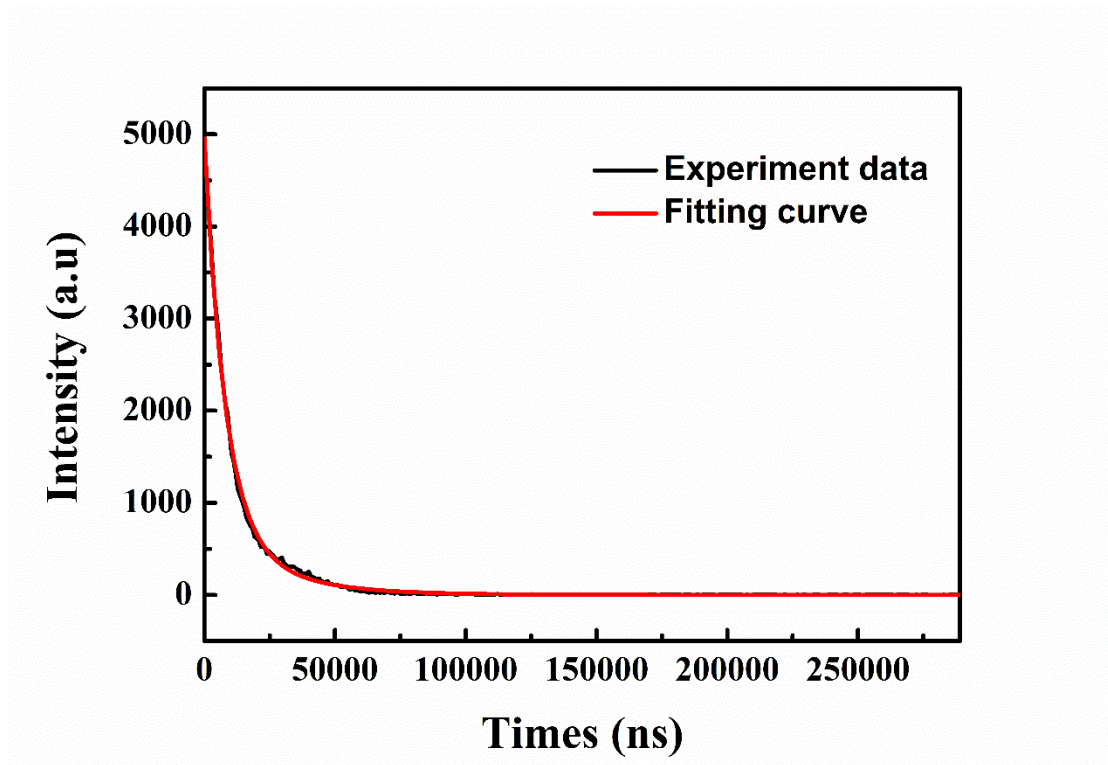

**Figure S3** Fluorescence lifetime decay curve of the  ${}^6\text{H}_{5/2}$ - ${}^6\text{H}_{7/2}$  luminescence of  $\text{Sm}_3(\text{IO}_3)_9(\text{HIO}_3)_4$  crystal under 466 nm excitation.

**Table S1.** Fractional atomic coordinates and isotropic or equivalent isotropic displacement parameters ( $\text{\AA}^2$ ) for  $\text{Sm}_3(\text{IO}_3)_9(\text{HIO}_3)_4$ .

| <b><math>\text{Sm}_3(\text{IO}_3)_9(\text{HIO}_3)_4</math></b> |              |             |              |              |           |
|----------------------------------------------------------------|--------------|-------------|--------------|--------------|-----------|
| Atom                                                           | x            | y           | z            | U(eq)        | Occ. (<1) |
| Sm1                                                            | 0.16732 (4)  | 0.20401 (3) | 0.88482 (5)  | 0.00986 (18) |           |
| I1                                                             | -0.03819 (5) | 0.13979 (5) | 0.93962 (7)  | 0.0178 (2)   |           |
| I2                                                             | 0.14349 (4)  | 0.25781 (5) | 0.62680 (6)  | 0.0120 (2)   |           |
| I3                                                             | 0.30483 (4)  | 0.30270 (4) | 1.09182 (7)  | 0.0126 (2)   |           |
| I4                                                             | 0.16395 (5)  | 0.38140 (4) | 0.86500 (6)  | 0.0117 (2)   |           |
| I5A                                                            | 0.3333       | 0.6667      | 0.95122 (17) | 0.0275 (5)   | 0.862 (5) |
| I5B                                                            | 0.3333       | 0.6667      | 1.0181 (12)  | 0.0275 (5)   | 0.138 (5) |
| O1                                                             | -0.0166 (7)  | 0.1674 (6)  | 1.0690 (9)   | 0.028 (3)    |           |
| O2                                                             | 0.1768 (6)   | 0.4323 (6)  | 0.9777 (8)   | 0.020 (2)    |           |
| O3                                                             | -0.0971 (6)  | 0.0457 (6)  | 0.9668 (8)   | 0.022 (2)    |           |
| O4                                                             | 0.2549 (6)   | 0.4251 (6)  | 0.8284 (10)  | 0.025 (2)    |           |
| O5                                                             | 0.3511 (7)   | 0.3965 (7)  | 1.0750 (11)  | 0.034 (3)    |           |
| O6                                                             | 0.0593 (5)   | 0.2071 (6)  | 0.5624 (8)   | 0.017 (2)    |           |
| O7                                                             | 0.1585 (7)   | 0.3049 (6)  | 0.9253 (8)   | 0.022 (2)    |           |
| O8                                                             | 0.2798 (5)   | 0.2744 (6)  | 0.9617 (8)   | 0.019 (2)    |           |
| O9                                                             | 0.3811 (5)   | 0.2904 (5)  | 1.0900 (7)   | 0.0132 (18)  |           |
| O10                                                            | 0.1086 (6)   | 0.1987 (7)  | 0.7333 (9)   | 0.032 (3)    |           |
| O11                                                            | 0.0389 (6)   | 0.1348 (7)  | 0.9045 (10)  | 0.034 (3)    |           |
| O12                                                            | 0.1327 (6)   | 0.3308 (7)  | 0.6694 (10)  | 0.031 (3)    |           |
| O13                                                            | 0.2861 (9)   | 0.5832 (9)  | 0.8857 (15)  | 0.051 (4)    |           |

**Table S2.** Anisotropic displacement parameters ( $\text{\AA}^2$ ) for  $\text{Sm}_3(\text{IO}_3)_9(\text{HIO}_3)_4$ .

| <b><math>\text{Sm}_3(\text{IO}_3)_9(\text{HIO}_3)_4</math></b> |            |            |             |            |             |             |
|----------------------------------------------------------------|------------|------------|-------------|------------|-------------|-------------|
| Atom                                                           | $U^{11}$   | $U^{22}$   | $U^{33}$    | $U^{23}$   | $U^{13}$    | $U^{12}$    |
| Sm1                                                            | 0.0102 (3) | 0.0102 (3) | 0.0110 (3)  | 0.0064 (3) | 0.0021 (2)  | 0.0014 (2)  |
| I1                                                             | 0.0133 (4) | 0.0124 (4) | 0.0207 (4)  | 0.0013 (3) | -0.0046 (3) | 0.0031 (3)  |
| I2                                                             | 0.0097 (4) | 0.0145 (4) | 0.0121 (4)  | 0.0063 (3) | -0.0017 (3) | -0.0028 (3) |
| I3                                                             | 0.0096 (4) | 0.0113 (4) | 0.0176 (4)  | 0.0058 (3) | 0.0010 (3)  | -0.0002 (3) |
| I4                                                             | 0.0127 (4) | 0.0107 (4) | 0.0139 (4)  | 0.0075 (3) | 0.0000 (3)  | -0.0018 (3) |
| I5A                                                            | 0.0259 (7) | 0.0259 (7) | 0.0306 (12) | 0.0129 (3) | 0.000       | 0.000       |
| I5B                                                            | 0.0259 (7) | 0.0259 (7) | 0.0306 (12) | 0.0129 (3) | 0.000       | 0.000       |
| O1                                                             | 0.031 (7)  | 0.026 (6)  | 0.026 (6)   | 0.014 (5)  | -0.008 (5)  | -0.010 (5)  |
| O2                                                             | 0.021 (4)  | 0.026 (4)  | 0.015 (4)   | 0.014 (3)  | -0.005 (3)  | -0.007 (3)  |
| O3                                                             | 0.016 (5)  | 0.018 (5)  | 0.019 (5)   | 0.000 (4)  | -0.009 (4)  | 0.000 (4)   |
| O4                                                             | 0.015 (5)  | 0.017 (5)  | 0.043 (7)   | 0.007 (4)  | 0.003 (5)   | 0.002 (5)   |
| O5                                                             | 0.023 (6)  | 0.020 (6)  | 0.053 (9)   | 0.007 (5)  | 0.001 (6)   | -0.006 (6)  |
| O6                                                             | 0.013 (5)  | 0.017 (5)  | 0.017 (5)   | 0.004 (4)  | -0.005 (4)  | -0.003 (4)  |
| O7                                                             | 0.031 (6)  | 0.023 (5)  | 0.019 (5)   | 0.018 (5)  | 0.003 (4)   | -0.001 (4)  |
| O8                                                             | 0.011 (5)  | 0.030 (6)  | 0.014 (5)   | 0.009 (5)  | -0.003 (4)  | -0.002 (4)  |
| O9                                                             | 0.011 (3)  | 0.017 (4)  | 0.014 (3)   | 0.009 (3)  | 0.000 (3)   | -0.002 (3)  |
| O10                                                            | 0.014 (5)  | 0.046 (8)  | 0.019 (5)   | 0.002 (5)  | -0.001 (4)  | 0.013 (5)   |
| O11                                                            | 0.017 (5)  | 0.044 (8)  | 0.037 (7)   | 0.012 (5)  | 0.006 (5)   | -0.003 (6)  |
| O12                                                            | 0.022 (6)  | 0.036 (7)  | 0.041 (7)   | 0.020 (6)  | -0.016 (5)  | -0.028 (6)  |
| O13                                                            | 0.040 (8)  | 0.042 (8)  | 0.070 (10)  | 0.020 (7)  | -0.010 (8)  | -0.022 (8)  |



**Table S3.** Selected bond lengths (Å) for Sm<sub>3</sub>(IO<sub>3</sub>)<sub>9</sub>(HIO<sub>3</sub>)<sub>4</sub>.

| Sm <sub>3</sub> (IO <sub>3</sub> ) <sub>9</sub> (HIO <sub>3</sub> ) <sub>4</sub> |            |                        |            |
|----------------------------------------------------------------------------------|------------|------------------------|------------|
| Sm1–O10                                                                          | 2.355 (11) | I3–O8                  | 1.821 (10) |
| Sm1–O7                                                                           | 2.370 (11) | I4–O4                  | 1.790 (11) |
| Sm1–O8                                                                           | 2.383 (10) | I4–O2                  | 1.799 (11) |
| Sm1–O3 <sup>i</sup>                                                              | 2.384 (10) | I4–O7                  | 1.805 (11) |
| Sm1–O2 <sup>ii</sup>                                                             | 2.390 (11) | I5A–I5B                | 0.886 (15) |
| Sm1–O6 <sup>iii</sup>                                                            | 2.399 (10) | I5A–O13 <sup>v</sup>   | 1.809 (15) |
| Sm1–O9 <sup>iv</sup>                                                             | 2.417 (10) | I5A–O13                | 1.809 (15) |
| Sm1–O11                                                                          | 2.449 (12) | I5A–O13 <sup>vi</sup>  | 1.809 (15) |
| I1–O1 1.800 (12) z                                                               | 1.375 (3)  | I5B–O13 <sup>v</sup>   | 2.365 (19) |
| I1–O11                                                                           | 1.805 (12) | I5B–O13                | 2.365 (19) |
| I1–O3                                                                            | 1.837 (11) | I5B–O13 <sup>vi</sup>  | 2.365 (19) |
| I2–O10                                                                           | 1.805 (11) | O2–Sm1 <sup>vii</sup>  | 2.390 (11) |
| I2–O12                                                                           | 1.817 (12) | O3–Sm1 <sup>viii</sup> | 2.384 (10) |
| I2–O6                                                                            | 1.819 (10) | O6–Sm1 <sup>ix</sup>   | 2.399 (10) |
| I3–O5                                                                            | 1.792 (13) | O9–Sm1 <sup>x</sup>    | 2.417 (10) |
| I3–O9                                                                            | 1.818 (10) |                        |            |

Symmetry codes: Symmetry codes: (i)  $-x+y, -x, z$ ; (ii)  $-y+2/3, -x+1/3, z-1/6$ ; (iii)  $-x+y, y, z+1/2$ ; (iv)  $-x+y+1/3, -x+2/3, z-1/3$ ; (v)  $-x+y, -x+1, z$ ; (vi)  $-y+1, x-y+1, z$ ; (vii)  $-y+1/3, -x+2/3, z+1/6$ ; (viii)  $-y, x-y, z$ ; (ix)  $-x+y, y, z-1/2$ ; (x)  $-y+2/3, x-y+1/3, z+1/3$

**Table S4.** Selected bond angles (degree) for Sm<sub>3</sub>(IO<sub>3</sub>)<sub>9</sub>(HIO<sub>3</sub>)<sub>4</sub>.

|                                         |           |                                         |           |
|-----------------------------------------|-----------|-----------------------------------------|-----------|
| O10–Sm1–O7                              | 86.7 (5)  | O10–I2–O12                              | 101.1 (7) |
| O10–Sm1–O8                              | 139.3 (4) | O10–I2–O6                               | 89.6 (5)  |
| O7–Sm1–O8                               | 80.8 (4)  | O12–I2–O6                               | 98.4 (5)  |
| O10–Sm1–O3 <sup>i</sup>                 | 119.4 (4) | O5–I3–O9                                | 97.6 (5)  |
| O7–Sm1–O3 <sup>i</sup>                  | 136.6 (4) | O5–I3–O8                                | 100.0 (6) |
| O8–Sm1–O3 <sup>i</sup>                  | 95.3 (4)  | O9–I3–O8                                | 94.5 (5)  |
| O10–Sm1–O2 <sup>ii</sup>                | 93.9 (5)  | O4–I4–O2                                | 96.1 (5)  |
| O7–Sm1–O2 <sup>ii</sup>                 | 148.3 (4) | O4–I4–O7                                | 99.0 (6)  |
| O8–Sm1–O2 <sup>ii</sup>                 | 78.2 (4)  | O2–I4–O7                                | 97.1 (5)  |
| O3 <sup>i</sup> –Sm1–O2 <sup>ii</sup>   | 69.3 (4)  | I5B–I5A–O13 <sup>v</sup>                | 118.7 (7) |
| O10–Sm1–O6 <sup>iii</sup>               | 137.5 (4) | I5B–I5A–O13                             | 118.7 (7) |
| O7–Sm1–O6 <sup>iii</sup>                | 69.7 (4)  | O13 <sup>v</sup> –I5A–O13               | 98.9 (8)  |
| O8–Sm1–O6 <sup>iii</sup>                | 72.7 (4)  | I5B–I5A–O13 <sup>vi</sup>               | 118.7 (7) |
| O3 <sup>i</sup> –Sm1–O6 <sup>iii</sup>  | 67.9 (4)  | O13 <sup>v</sup> –I5A–O13 <sup>vi</sup> | 98.9 (8)  |
| O2 <sup>ii</sup> –Sm1–O6 <sup>iii</sup> | 124.8 (4) | O13–I5A–O13 <sup>vi</sup>               | 98.9 (8)  |
| O10–Sm1–O9 <sup>iv</sup>                | 65.8 (3)  | I5A–I5B–O13 <sup>v</sup>                | 42.1 (6)  |
| O7–Sm1–O9 <sup>iv</sup>                 | 79.3 (4)  | I5A–I5B–O13                             | 42.1 (6)  |
| O8–Sm1–O9 <sup>iv</sup>                 | 73.8 (3)  | O13 <sup>v</sup> –I5B–O13               | 71.0 (9)  |
| O3 <sup>i</sup> –Sm1–O9 <sup>iv</sup>   | 141.3 (4) | I5A–I5B–O13 <sup>vi</sup>               | 42.1 (6)  |
| O2 <sup>ii</sup> –Sm1–O9 <sup>iv</sup>  | 72.2 (3)  | O13 <sup>v</sup> –I5B–O13 <sup>vi</sup> | 71.0 (9)  |
| O6 <sup>iii</sup> –Sm1–O9 <sup>iv</sup> | 137.2 (3) | O13–I5B–O13 <sup>vi</sup>               | 71.0 (9)  |
| O10–Sm1–O11                             | 68.4 (4)  | I4–O2–Sm1 <sup>vii</sup>                | 137.6 (6) |
| O7–Sm1–O11                              | 87.1 (4)  | I1–O3–Sm1 <sup>viii</sup>               | 129.2 (5) |
| O8–Sm1–O11                              | 148.1 (4) | I2–O6–Sm1 <sup>ix</sup>                 | 127.5 (5) |
| O3 <sup>i</sup> –Sm1–O11                | 73.7 (4)  | I4–O7–Sm1                               | 139.9 (6) |
| O2 <sup>ii</sup> –Sm1–O11               | 122.6 (4) | I3–O8–Sm1                               | 131.5 (5) |
| O6 <sup>iii</sup> –Sm1–O11              | 75.4 (4)  | I3–O9–Sm1 <sup>x</sup>                  | 133.5 (5) |
| O9 <sup>iv</sup> –Sm1–O11               | 132.7 (4) | I2–O10–Sm1                              | 127.4 (6) |
| O1–I1–O11                               | 99.8 (6)  | I1–O11–Sm1                              | 143.9 (7) |
| O1–I1–O3                                | 96.2 (5)  | I5A–O13–I5B                             | 19.2 (3)  |
| O11–I1–O3                               | 97.8 (6)  |                                         |           |
